# Supplementary material for: Effect of Microwave Vacuum Drying on the Drying Characteristics, Color, Microstructure, and Antioxidant Activity of Green Coffee Beans
Source: PubMed Central journal article supplement (PMC6100066; doi:10.3390/molecules23051146), 2018-05-11

## Supplementary material

**Supplemental Table 1.** Ten thin-layer drying models used for experimental data fitting.

| NO. | Model name                  | Model                                             | Reference                                |
|-----|-----------------------------|---------------------------------------------------|------------------------------------------|
| 1   | Page                        | $MR = \text{Exp}(-kt^n)$                          | Rodriguez, & Cleland, 1988 [33]          |
| 2   | Lewis                       | $MR = \text{Exp}(-kt)$                            | Midilli, Kucuk, & Yapar, 2002 [34]       |
| 3   | Henderson & Pabis           | $MR = a \text{Exp}(-kt)$                          | Xanthopoulos et al., 2007 [35]           |
| 4   | Modified page               | $MR = \text{Exp}(-kt)^n$                          | Midilli, Kucuk, & Yapar, 2002 [34]       |
| 5   | Wang & Singh                | $MR = 1 + at + bt^2$                              | Midilli, Kucuk, & Yapar, 2002 [34]       |
| 6   | Approximation of diffusion  | $MR = a \text{Exp}(-kt) + (1-a) \text{Exp}(-kat)$ | Contini, Martelli, & Zaccanti, 1997 [36] |
| 7   | Logarithmic                 | $MR = a \text{Exp}(-kt) + c$                      | Midilli, Kucuk, & Yapar, 2002 [34]       |
| 8   | Simplified Fick's diffusion | $MR = a \text{Exp}(-c(t/l^2))$                    | Midilli, Kucuk, & Yapar, 2002 [34]       |
| 9   | Modified Page equation-II   | $MR = \text{Exp}(-c(t/l^2)^n)$                    | Wang et al., 2007 [37]                   |
| 10  | Two-term model              | $MR = a \text{Exp}(-k_0t) + b \text{Exp}(-k_1t)$  | Mohapatra, & Rao, 2005 [38]              |

**Supplemental Table 2.** Statistical analyses of modelling of the moisture ratio and drying time during MVD.

| Drying condition |          | Page           | Lewis  | Modified page | Wang & Singh | Logarithmic    |
|------------------|----------|----------------|--------|---------------|--------------|----------------|
| 0.3 kW           | $R^2$    | 0.9930         | 0.9271 | 0.9180        | 0.9866       | <b>0.9950</b>  |
|                  | $RMSE$   | 0.0057         | 0.0672 | 0.0672        | 0.0110       | <b>0.0036</b>  |
|                  | $\chi^2$ | 7.16E-4        | 0.0075 | 0.0084        | 0.0014       | <b>5.14E-4</b> |
| 0.5 kW           | $R^2$    | <b>0.9912</b>  | 0.9367 | 0.9276        | 0.9799       | 0.9872         |
|                  | $RMSE$   | <b>0.0055</b>  | 0.0450 | 0.0450        | 0.0125       | 0.0068         |
|                  | $\chi^2$ | <b>7.82E-4</b> | 0.0056 | 0.0064        | 0.0018       | 0.0011         |
| 1.0 kW           | $R^2$    | <b>0.9927</b>  | 0.9303 | 0.9203        | 0.9772       | 0.9858         |
|                  | $RMSE$   | <b>0.0050</b>  | 0.0552 | 0.0552        | 0.0158       | 0.0084         |
|                  | $\chi^2$ | <b>7.19E-4</b> | 0.0069 | 0.0079        | 0.0023       | 0.0014         |
| 1.5 kW           | $R^2$    | 0.9944         | 0.9486 | 0.9428        | 0.9816       | 0.9916         |
|                  | $RMSE$   | 0.0041         | 0.0426 | 0.0426        | 0.0137       | 0.0056         |
|                  | $\chi^2$ | 4.60E-4        | 0.0043 | 0.0047        | 0.0015       | 6.94E-4        |
| 2.0 kW           | $R^2$    | <b>0.9928</b>  | 0.9179 | 0.9042        | 0.9738       | 0.9873         |
|                  | $RMSE$   | <b>0.0036</b>  | 0.0478 | 0.0478        | 0.0131       | 0.0053         |
|                  | $\chi^2$ | <b>6.01E-4</b> | 0.0068 | 0.0080        | 0.0022       | 0.0011         |

| Henderson & Pabis | Approximation of diffusion | Simplified Fick's diffusion | Modified Page equation-II | Two-term Model |
|-------------------|----------------------------|-----------------------------|---------------------------|----------------|
| 0.9563            | 0.9180                     | 0.9501                      | 0.9920                    | 0.9418         |
| 0.0358            | 0.0672                     | 0.0358                      | 0.0057                    | 0.0358         |
| 0.0045            | 0.0084                     | 0.0051                      | 8.17E-4                   | 0.0060         |
| 0.9615            | 0.9276                     | 0.9551                      | 0.9897                    | 0.9461         |
| 0.0239            | 0.0450                     | 0.0239                      | 0.0055                    | 0.0239         |
| 0.0034            | 0.0064                     | 0.0040                      | 9.12E-4                   | 0.0048         |
| 0.9573            | 0.9203                     | 0.9502                      | 0.9915                    | 0.9402         |
| 0.0296            | 0.0553                     | 0.0296                      | 0.0050                    | 0.0296         |
| 0.0042            | 0.0079                     | 0.0049                      | 8.39E-4                   | 0.0059         |
| 0.9760            | <b>0.9956</b>              | 0.9730                      | 0.9937                    | 0.9691         |
| 0.0179            | <b>0.0033</b>              | 0.0179                      | 0.0041                    | 0.0179         |
| 0.0020            | <b>3.65E-4</b>             | 0.0022                      | 5.18E-4                   | 0.0026         |
| 0.9548            | 0.7588                     | 0.9458                      | 0.9913                    | 0.9323         |
| 0.0226            | 0.1204                     | 0.0226                      | 0.0036                    | 0.0226         |
| 0.0038            | 0.0201                     | 0.0045                      | 7.21E-4                   | 0.0056         |

Undertake the above Table.

**Supplemental Table 3.** Peak area ratios for the three states of water.

| Microwave power (kW) | Drying time (min) | A <sub>21</sub> (%) | A <sub>22</sub> (%) | A <sub>23</sub> (%) |
|----------------------|-------------------|---------------------|---------------------|---------------------|
| 0.3 kW               | 0                 | 0.210               | 0.698               | 0.092               |
|                      | 56.0              | 0.251               | 0.702               | 0.047               |
|                      | 112.0             | 0.974               | 0.000               | 0.026               |
|                      | 168.0             | 0.930               | 0.000               | 0.070               |
|                      | 224.0             | 0.760               | 0.113               | 0.127               |
|                      | 280.0             | 0.655               | 0.340               | 0.005               |
| 0.5 kW               | 32.0              | 0.000               | 0.935               | 0.065               |
|                      | 64.0              | 0.933               | 0.000               | 0.067               |
|                      | 96.0              | 0.813               | 0.123               | 0.063               |
|                      | 128.0             | 0.805               | 0.115               | 0.080               |
|                      | 160.0             | 0.826               | 0.000               | 0.174               |
| 1.0 kW               | 15.0              | 0.000               | 0.938               | 0.062               |
|                      | 30.0              | 0.978               | 0.000               | 0.022               |
|                      | 45.0              | 0.845               | 0.093               | 0.062               |
|                      | 60.0              | 0.832               | 0.116               | 0.052               |
|                      | 75.0              | 0.776               | 0.125               | 0.100               |
| 1.5 kW               | 10.0              | 0.000               | 0.907               | 0.093               |
|                      | 20.0              | 0.956               | 0.000               | 0.044               |
|                      | 30.0              | 0.871               | 0.110               | 0.019               |
|                      | 40.0              | 0.833               | 0.129               | 0.038               |
|                      | 50.0              | 0.709               | 0.237               | 0.054               |
| 2.0 kW               | 7.0               | 0.017               | 0.925               | 0.058               |
|                      | 14.0              | 0.974               | 0.000               | 0.026               |
|                      | 21.0              | 0.866               | 0.093               | 0.041               |
|                      | 28.0              | 0.855               | 0.084               | 0.060               |
|                      | 36.0              | 0.797               | 0.102               | 0.101               |

**Supplemental Table 4.** The Person correlation coefficients for different chemical properties of microwave-dried coffee beans.

|      | TPC     | DPPH    | FRAP  | ABTS  |
|------|---------|---------|-------|-------|
| TPC  | 1.000   |         |       |       |
| DPPH | 0.660** | 1.000   |       |       |
| FRAP | 0.916** | 0.706** | 1.000 |       |
| ABTS | 0.180   | 0.070   | 0.249 | 1.000 |

\*\* $p < 0.01$ .

**Supplemental Figure 1.** DSC spectra of coffee beans dried at five different microwave power settings.

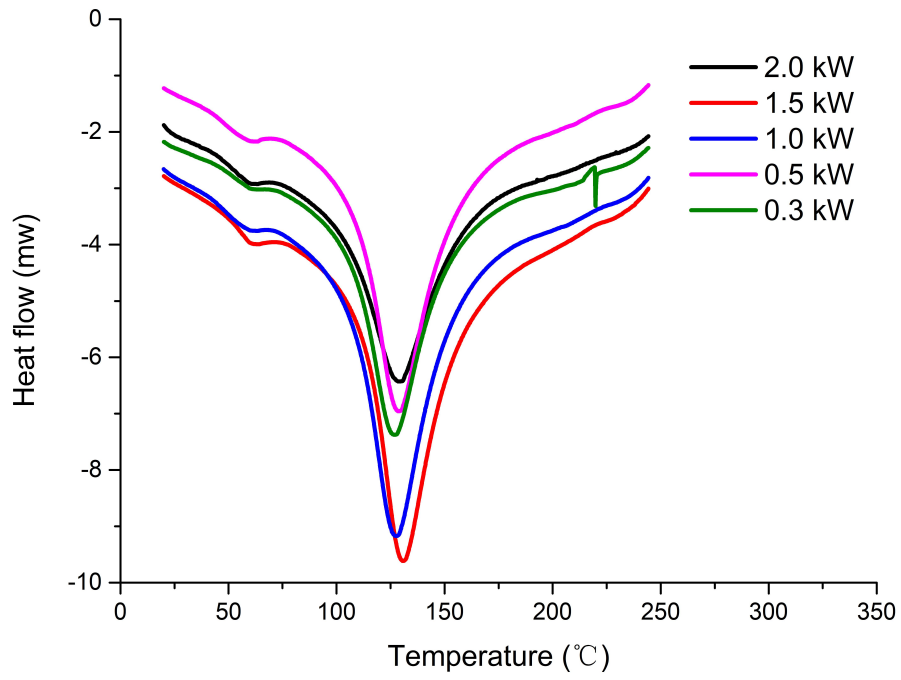

**Supplemental Figure 2.** NMR imaging of samples at six stages of the drying process at 1.0-kW microwave power: (a) 0 min; (b) 15.0 min; (c) 30.0 min; (d) 45.0 min; (e) 60.0 min; and (f) 75.0 min.

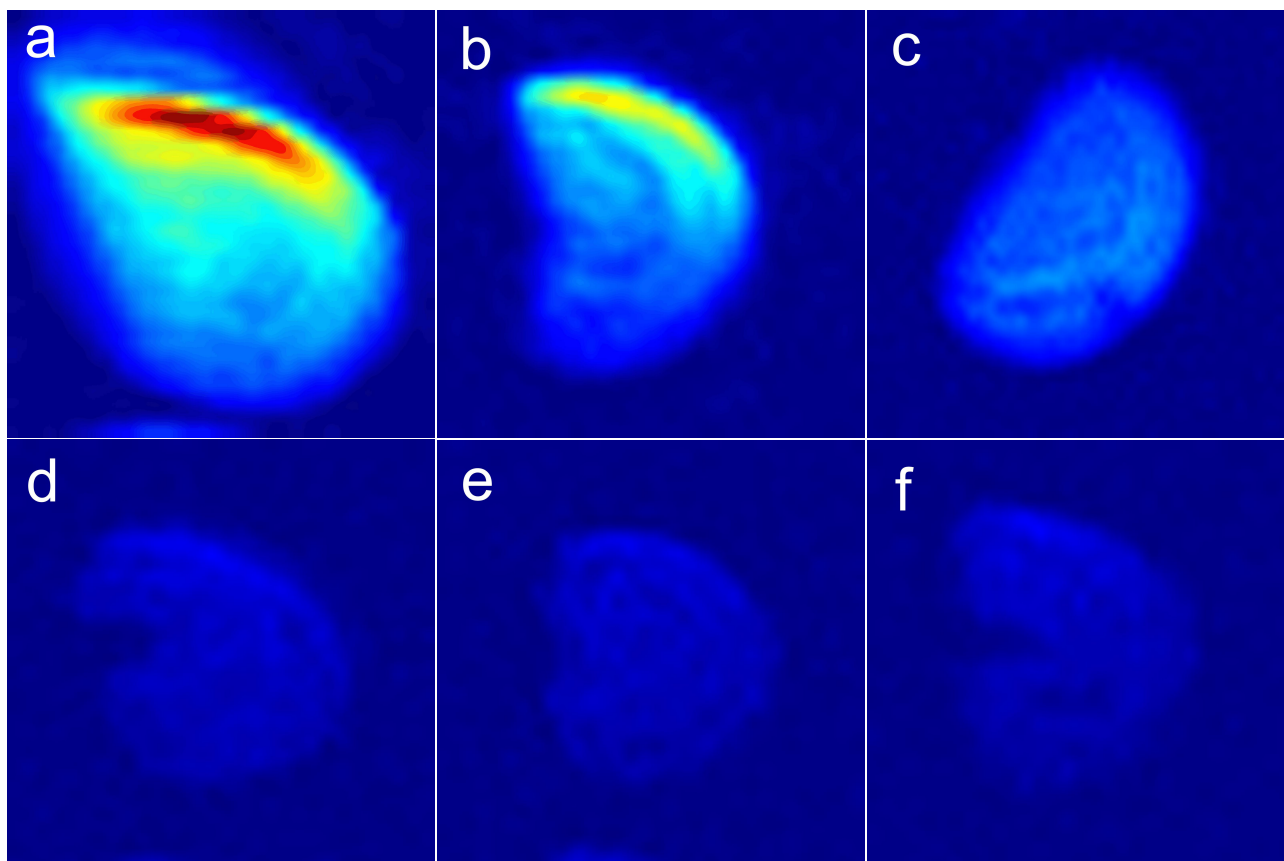

**Supplemental Figure 3.** Infrared thermal imaging of samples at eight stages of the drying process at 1.0 kW microwave power: (a) 0 min; (b) 10.0 min; (c) 20.0 min; (d) 30.0 min; (e) 40.0 min; (f) 50.0 min; (g) 60.0 min; and (h) 75.0 min.

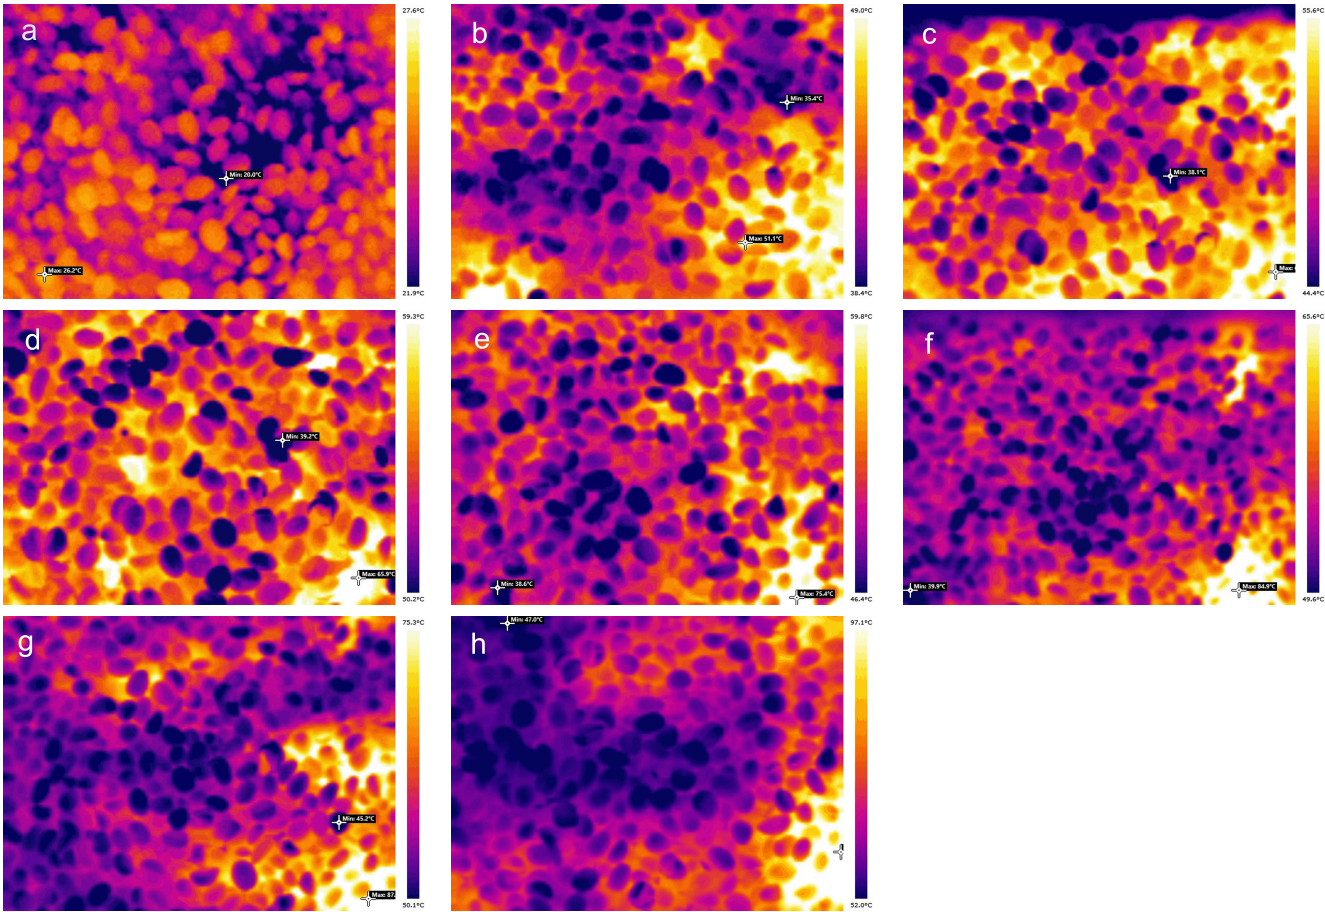

Supplement: molecules-23-01146-s001.pdf [file molecules-23-01146-s001.pdf]
